# Supplementary material
Source: MDPI journal article supplement (https://www.mdpi.com/2073-4433/13/8/1260)
Supplement: s1 [file s1]

## Supplementary Materials:

# Electric Field-Driven Air Purification Filter for High Efficiency Removal of PM<sub>2.5</sub> and SO<sub>2</sub>: Local Electric Field Induction and External Electric Field Enhancement

Jian Li <sup>1,2</sup>, Qingyun Sun <sup>2</sup>, Zhongxin Ping <sup>2</sup>, Yihong Gao <sup>2</sup>, Peiyu Chen <sup>2</sup> and Fangzhi Huang <sup>2,\*</sup>

<sup>1</sup> Department of Chemical and Chemical Engineering, Hefei Normal University, Hefei 230601, China

<sup>2</sup> Lab of Clean Energy & Environmental Catalysis, Anhui Province Key Laboratory of Chemistry for Inorganic/Organic Hybrid Functionalized Materials, School of Chemistry and Chemical Engineering, Anhui University, Hefei 230601, China

\* Correspondence: huangfangzhi@163.com; Tel.: +86-551-63861328

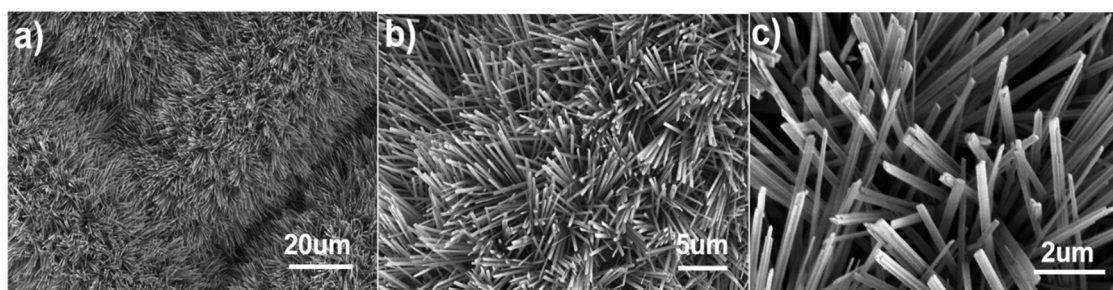

Figure S1. a)-c) Different magnification SEM images of Cu(OH)<sub>2</sub> nanowires grown on 400 mesh.

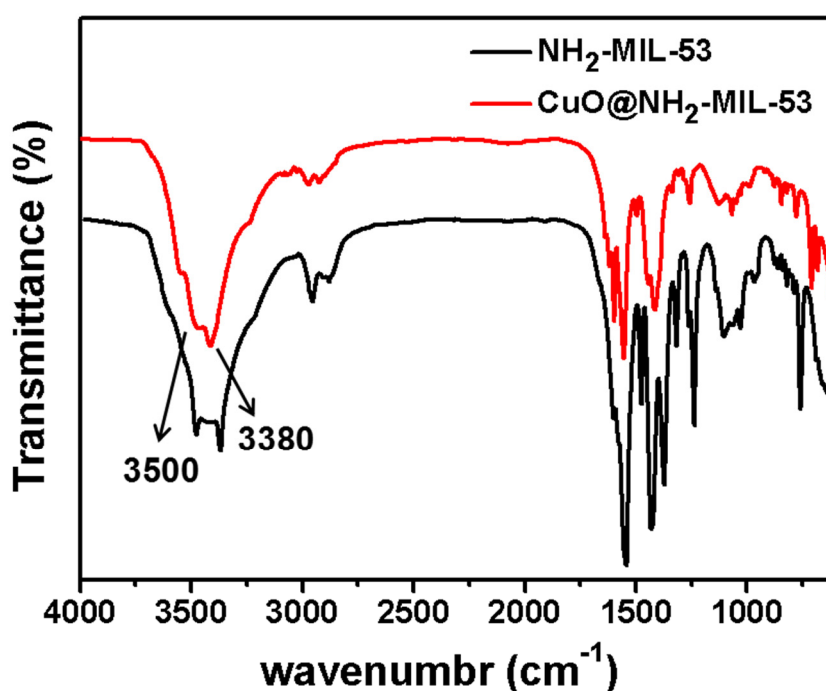

Figure S2. IR spectrum of NH<sub>2</sub>-MIL-53(Al) and CuO@NH<sub>2</sub>-MIL-53(Al). The two sharp bands at 3380 cm<sup>-1</sup> and 3500 cm<sup>-1</sup> are due to the symmetric and asymmetric N-H vibrations respectively.

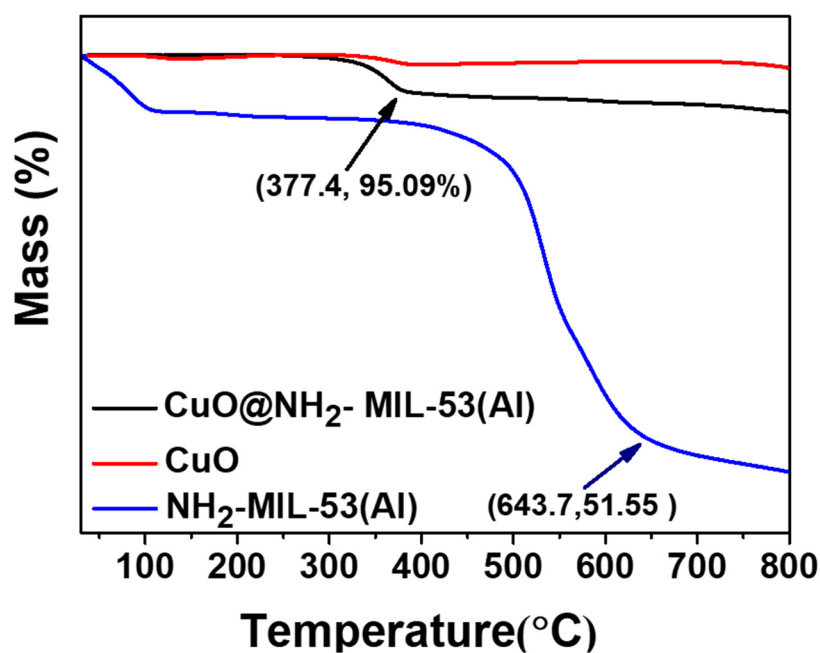

**Figure S3.** TG curves of the as-prepared NH<sub>2</sub>-MIL-53(Al), CuO and CuO@ NH<sub>2</sub>-MIL-53(Al) NWAs/CM.

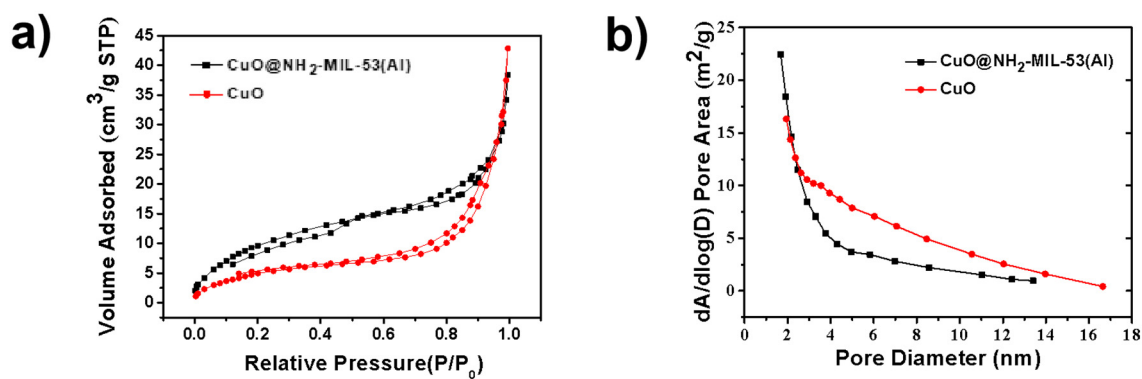

**Figure S4.** (a) Nitrogen adsorption-desorption isotherms and (b) BJH pore diameter distribution curves of CuO and CuO@NH<sub>2</sub>-MIL-53(Al).

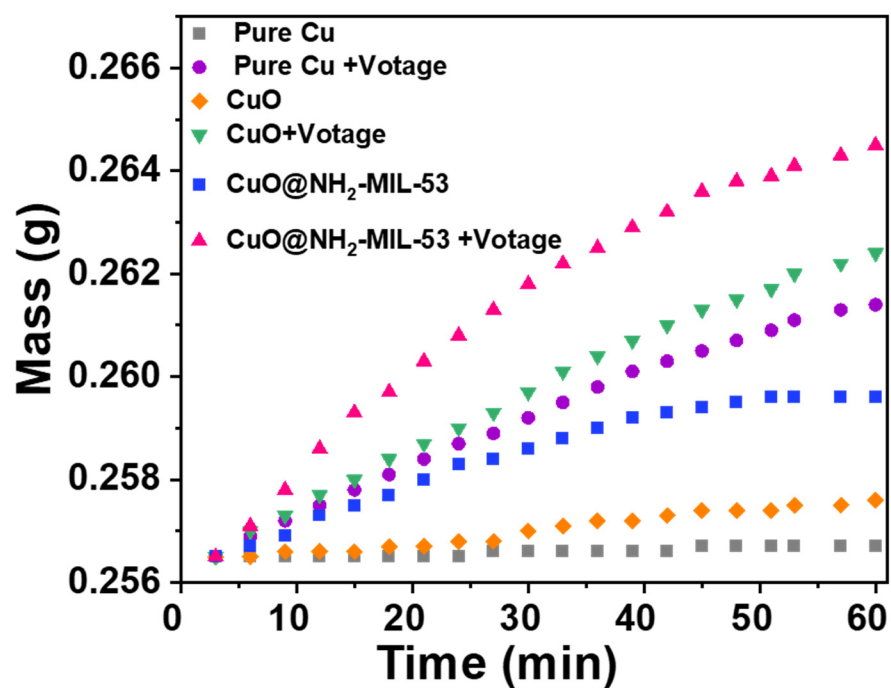

**Figure S5.** The areal mass change of the filters after PM<sub>2.5</sub> capture with different adsorption time of pure Cu mesh, CuO filter and CuO@NH<sub>2</sub>-MIL-53(Al) filter under an applied electric field and without electric field.

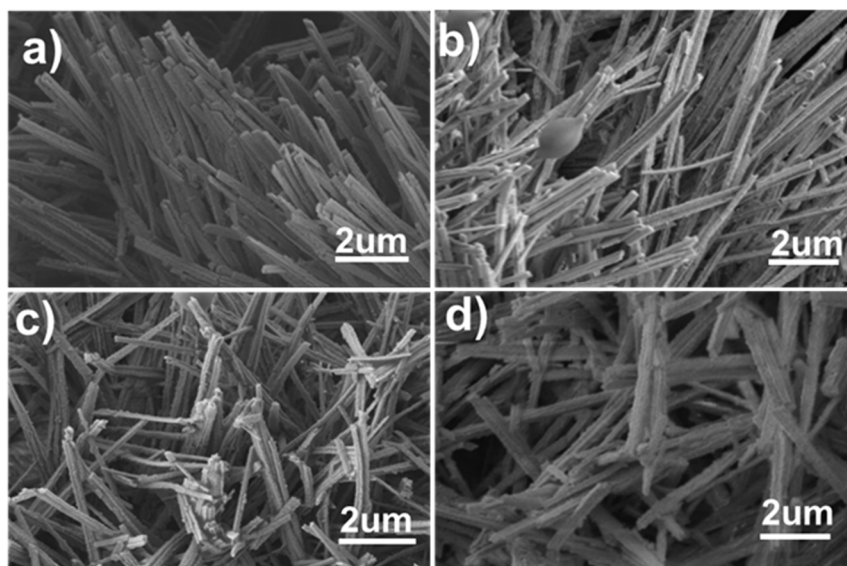

**Figure S6.** SEM images of the CuO@NH<sub>2</sub>-MIL-53(Al) filter with different time of PM<sub>2.5</sub> capture at zero electric field. a) 0min, b) 10 min, c) 30min, d) 60 min.

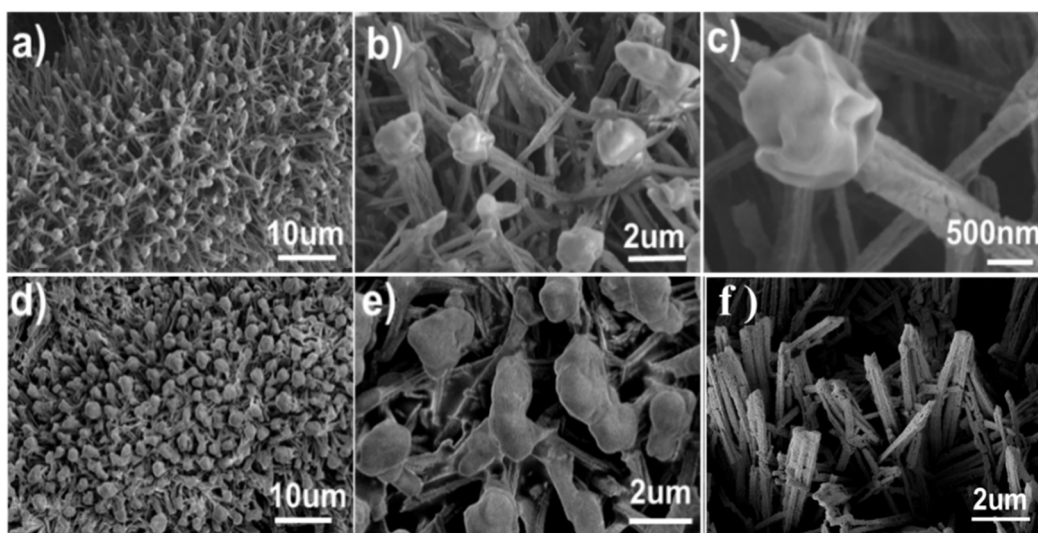

**Figure S7.** SEM images of CuO@NH<sub>2</sub>-MIL-53(Al) filter with different time of PM<sub>2.5</sub> capture under an applied electric field. (a-c) 30 min, (d-e) 60 min, and (f) after ethylene glycol washing.

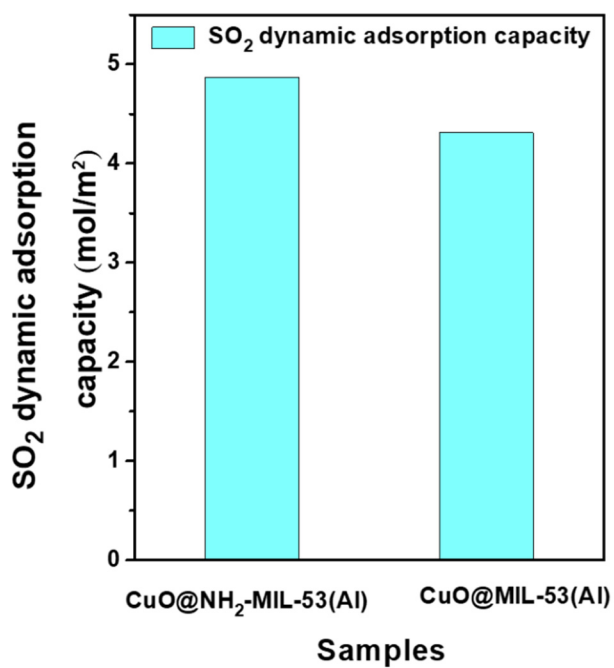

**Figure S8.** SO<sub>2</sub> adsorption performances of the CuO@NH<sub>2</sub>-MIL-53(Al) and CuO@MIL-53(Al) filters.
